# Supplementary material for: Dehydropolymerisation of methylamine borane using a dinuclear 1,3-allenediyl bridged zirconocene complex
Source: Royal Society of Chemistry journal article supplement (doi:10.1039/c8dt03311k), 2018-01-01
Supplement: c8dt03311k1.pdf [file c8dt03311k1.pdf]

Supporting Information

## Dehydropolymerisation of methylamine borane using a dinuclear 1,3-allenediyl bridged zirconocene complex

Michael Trose<sup>a</sup>, Melanie Reiß<sup>a</sup>, Fabian Reiß<sup>a\*</sup>, Felix Anke<sup>a</sup>, Anke Spannenberg<sup>a</sup>, Susanne Boye<sup>b</sup>, Albena Lederer<sup>b,c</sup>, Perdita Arndt<sup>a</sup>, and Torsten Beweries<sup>a\*</sup>

<sup>a</sup> Leibniz-Institut für Katalyse e.V. an der Universität Rostock, Albert-Einstein-Str. 29a, 18059 Rostock, Germany.

<sup>b</sup> Leibniz-Institut für Polymerforschung Dresden e.V. , Hohe Str. 6, 01069 Dresden, Germany.

<sup>c</sup> Technische Universität Dresden, 01062 Dresden, Germany

### Table of contents

|                             |     |
|-----------------------------|-----|
| 1. Experimental details     | S2  |
| 2. Catalytic tests          | S8  |
| 3. Polymer characterisation | S16 |
| 4. Stoichiometric test      | S24 |
| 5. Crystallographic details | S26 |
| 6. References               | S31 |

## 1. Experimental details

*General:* All manipulations were carried out in an oxygen- and moisture-free argon atmosphere using standard Schlenk and drybox techniques. The solvents were purified with the Grubbs-type column system "Pure Solv MD-5" and dispensed into thick-walled glass Schlenk bombs equipped with Young-type Teflon valve stopcocks. Complexes **1** and **3** were prepared according to literature procedures.<sup>[1]</sup> Cp<sub>2</sub>ZrCl<sub>2</sub> (MCAT) was used as received. MAB (Boron Specialties), NH<sub>2</sub>Me·HCl (Sigma), MeLi (1.6 M solution in Et<sub>2</sub>O, Sigma), and D<sub>2</sub> (Linde) were used as received. For stoichiometric conversions of **1** we used a MeLi·BrLi solution 1.5 M in diethyl ether (Sigma) which was transferred to a Schlenk flask and stored under Ar atmosphere in the fridge. Na[HBtEt<sub>3</sub>] (2.0 M solution in toluene, Sigma) was transferred to a Schlenk flask and stored under Ar atmosphere in the fridge. GaCl<sub>3</sub> (Sigma, >99.9%) and BH<sub>3</sub>·NMe<sub>3</sub> (Sigma) were sublimed prior to use and stored in the glovebox. [(dppp)Rh(nbd)][BF<sub>4</sub>] was similarly to a described literature procedure.<sup>[2]</sup>

NMR spectra were recorded on Bruker AV300 and AV400 spectrometers. <sup>1</sup>H and <sup>13</sup>C chemical shifts were referenced to the solvent signal: [D<sub>6</sub>]benzene ( $\delta_{\text{H}}$  7.16,  $\delta_{\text{C}}$  128.06) and CDCl<sub>3</sub> ( $\delta_{\text{H}}$  7.26,  $\delta_{\text{C}}$  77.16)<sup>[3]</sup>

Diffraction data for complex **2** and **4** were collected on a Bruker Kappa APEX II Duo diffractometer. The structures were solved by direct methods (SHELXS-97)<sup>[4]</sup> and refined by full-matrix least-squares procedures on *F*<sup>2</sup> (SHELXL-2014).<sup>[5]</sup> Diamond<sup>[6]</sup>, XP (Bruker AXS) and Mercury<sup>[7]</sup> were used for graphical representations. CCDC 1851926 and 1851927 contain the supplementary crystallographic data for this paper. These data are provided free of charge by The Cambridge Crystallographic Data Centre.

SEC analysis was performed for molar mass determination. All samples were filtered before measurement. The SEC system consists of an isocratic pump series 1200 (Agilent Technologies, US), an autosampler series 1100 (Agilent Technologies, US), an refractive index (RI) detector Dn-2010 ( $\lambda$ =620 nm, Bures, DE), a multi-angle laser light scattering detector (MALLS, Wyatt Technologies, US). For the separation a PL MIXED-C column (300x7.5 mm, 5  $\mu$ m PSgel, Agilent Technologies, US) was used. The flow rate was 1.0 mL/min at 25°C.

The calculation of the molar mass from the MALLS detector was performed by taking into account the dn/dc of the samples, which were determined by direct injection into the RI detector of samples with varied concentration.

## Synthesis of 2

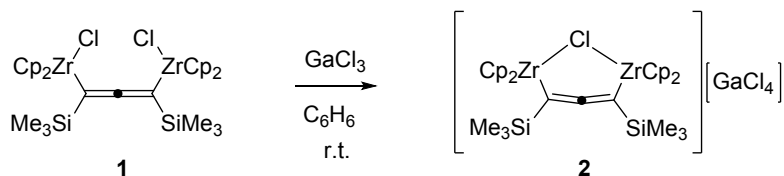

To a colourless stirred solution of GaCl<sub>3</sub> (40 mg, 0.24 mmol) in 10 mL benzene an orange solution of **1** (168 mg, 0.24 mmol) in 7 mL benzene was added dropwise at 0 °C. This leads to immediately precipitation of red **2**. After filtering of the supernatant, washing the precipitate with further benzene (3 x 1 mL) and drying in vacuo reddish **2** was obtained (150 mg, 72%). Due to high reactivity and poor solubility of **2** only unsatisfactorily analytical data could be collected.

Crystals in poor quality due to the fast crystal growth were obtained by slow diffusion of a solution of **1** in benzene into a solution of GaCl<sub>3</sub> in benzene. The structural motif is depicted below.

Attempted solvation experiments of **2** in deuterated DMSO, acetonitrile as well as chloroform only lead to the detection of unidentified decomposition products. Furthermore **2** dissolves nicely in THF but turned to be a good catalyst for its ring opening polymerisation which prevents further analysis.

<sup>1</sup>H NMR (300 MHz, C<sub>6</sub>D<sub>6</sub>, 298 K): δ = 0.25 (br., 18H, Me<sub>3</sub>Si), 5.88 (s, 20H, Cp).

## Synthesis of 4

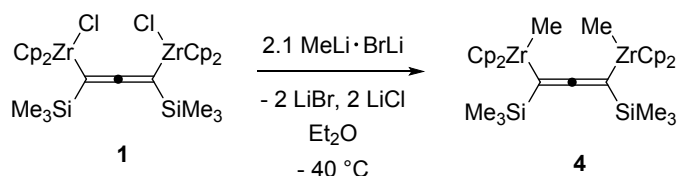

Complex **1** (200 mg, 0.29 mmol) was dissolved in diethyl ether (20 mL) and cooled to -78 °C. To this clear orange solution a MeLi·BrLi solution (1.5M, 0.385 mL, 0.57 mmol) was added dropwise and stirred for 5 hours. The resulting reddish solution was stored at -40 °C for 14 hours. This suspension was concentrated to approximately ¼ of the volume and lithium salts were separated by filtration at -40 °C. This clear reddish solution was allowed to cool slowly to -78 °C resulting in the deposition of single crystals of compound **4**.

<sup>1</sup>H NMR (25 °C, [D<sub>6</sub>]benzene, 300.13 MHz): δ = 5.92 (s, 10H, Cp), 5.90 (s, 10H, Cp), 0.34 (s, 6H, Me), 0.33 (s, 18H, CSi(CH<sub>3</sub>)<sub>3</sub>). <sup>13</sup>C{<sup>1</sup>H} NMR (25 °C, [D<sub>6</sub>]benzene, 100.63 MHz): δ = 111.12 (Cp), 110.79 (Cp), 35.3 (Me), 3.4 (CSi(CH<sub>3</sub>)<sub>3</sub>) <sup>29</sup>Si inept NMR (25 °C, [D<sub>6</sub>]benzene, 79.49 MHz): δ = -8.38. MS-Cl<sup>+</sup> (isobutene): [M<sup>+</sup>-CH<sub>3</sub>] 637, [M<sup>+</sup>-2 CH<sub>3</sub>] 622 [Cp<sub>2</sub>Zr(Me<sub>3</sub>SiC<sub>3</sub>SiMe<sub>3</sub>)<sup>+</sup>] 403.

Single crystals suitable for X-ray diffraction analysis were obtained from a saturated benzene solution.

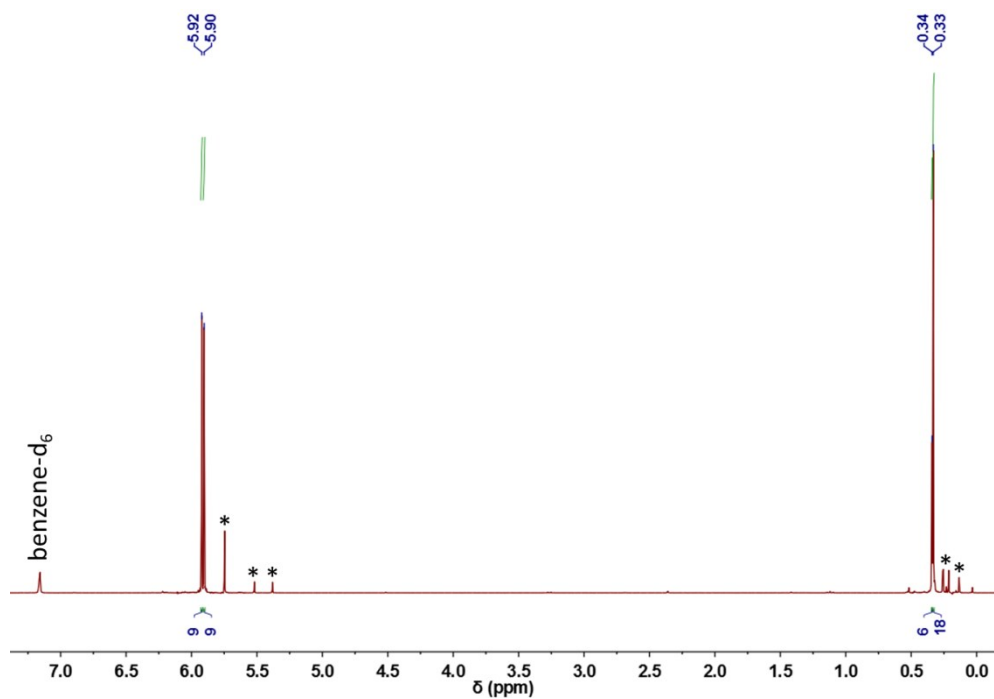

**Figure S1.**  $^1\text{H}$  NMR spectrum of **4** in  $\text{C}_6\text{D}_6$ , asterisk marks unidentified impurities (25 °C,  $[\text{D}_6]$ benzene, 300.13 MHz).

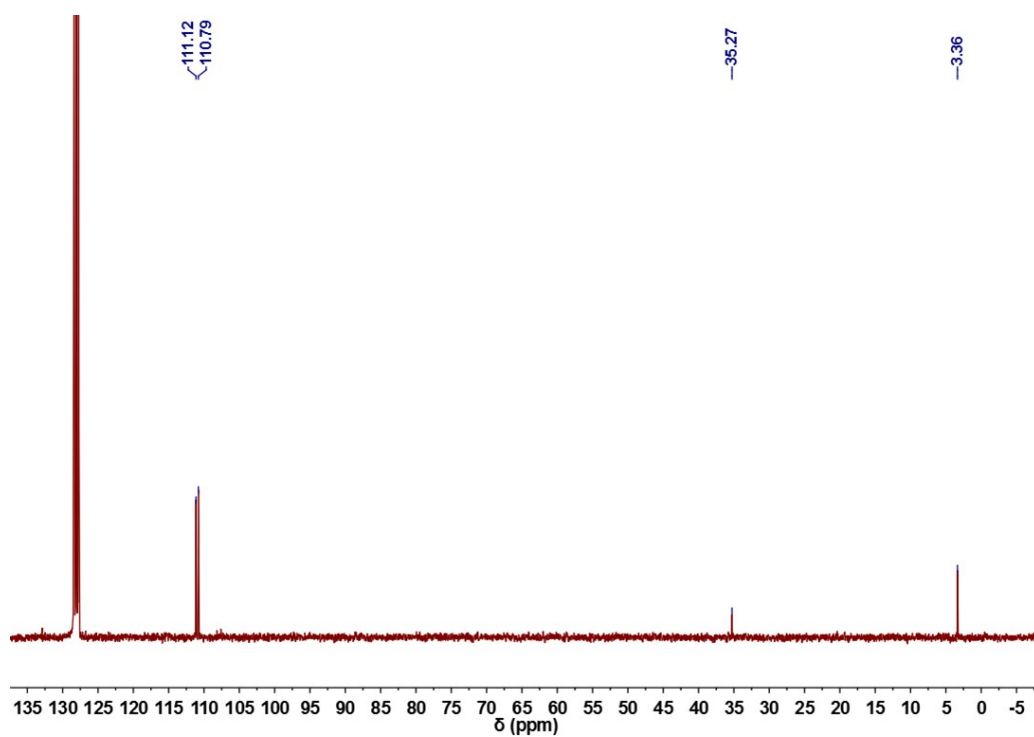

**Figure S2.**  $^{13}\text{C}$  NMR spectrum of **4** in  $\text{C}_6\text{D}_6$  (25 °C,  $[\text{D}_6]$ benzene, 100.63 MHz).

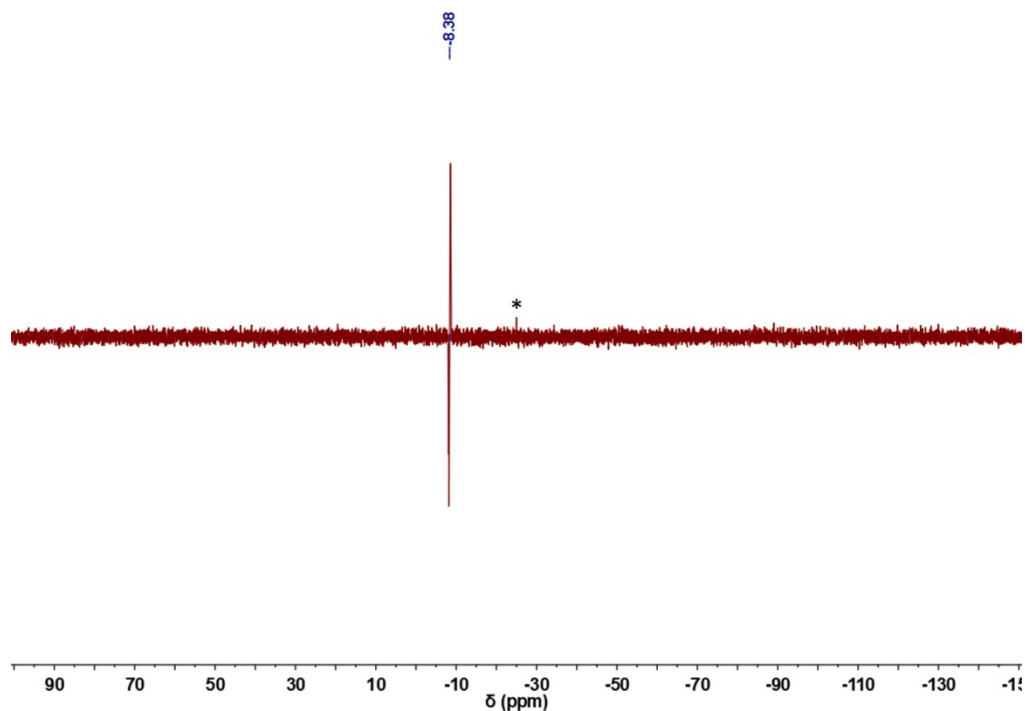

**Figure S3.**  $^{29}\text{Si}$  NMR spectrum of **4** in  $\text{C}_6\text{D}_6$ , asterisk marks unidentified impurities (25 °C,  $[\text{D}_6]$ benzene, 79.49 MHz).

### Synthesis of $\text{Li}[\text{MeNH}\cdot\text{BH}_3]$

MAB (360 mg, 8 mmol) was weighed in the glovebox, transferred into a Schlenk flask and dissolved in 20 mL of THF. MeLi (5 mL of a 1.6M solution in  $\text{Et}_2\text{O}$ , 8 mmol) was added dropwise at 0 °C and gas evolution was noticed. The reaction was allowed to warm to room temperature and stirred for 1 h. Volatiles were removed affording  $\text{Li}[\text{MeNH}\cdot\text{BH}_3]$  as a white solid (220 mg).

### Synthesis of $\text{Et}_3\text{B}\cdot\text{NH}_2\text{Me}$

10 mL of a 1M solution of  $\text{Na}[\text{HBEt}_3]$  (10 mmol) in toluene were transferred into a flame dried Schlenk flask and diluted with 40 mL of *n*-hexane.  $\text{NH}_2\text{Me}\cdot\text{HCl}$  (15 mmol) was added dropwise into the open Schlenk flask under a flow of argon at 0 °C, during which vigorous bubbling ( $\text{H}_2$ ) was observed. The reaction was allowed to warm to room temperature and stirred for additional 30 min. Filtration and evaporation of the volatiles at room temperature afforded as colourless liquid (780 mg, 60%).  **$^1\text{H}$  NMR** (300 MHz,  $\text{C}_6\text{D}_6$ , 298 K):  $\delta = 1.49$  (bs, 2H,  $\text{NH}_2$ ), 1.40 (m, 3H,  $\text{NCH}_3$ ), 0.94 (t,  $^3J = 7.8$  Hz, 9H,  $\text{CH}_3$ ), 0.32 (q,  $^3J = 7.8$  Hz, 6H,  $\text{CH}_2$ ).  **$^{11}\text{B}$  NMR** (96 MHz,  $\text{C}_6\text{D}_6$ , 298 K):  $\delta = -3.03$  (s).  **$^{13}\text{C}$  NMR** (100 MHz,  $\text{C}_6\text{D}_6$ , 298 K):  $\delta = 25.8$  (s,  $\text{N-CH}_3$ ), 12.8 (bd,  $^1J_{\text{C-B}} = 49$  Hz,  $\text{B-CH}_2$ ), 10.1 (s,  $\text{CH}_3$ ).

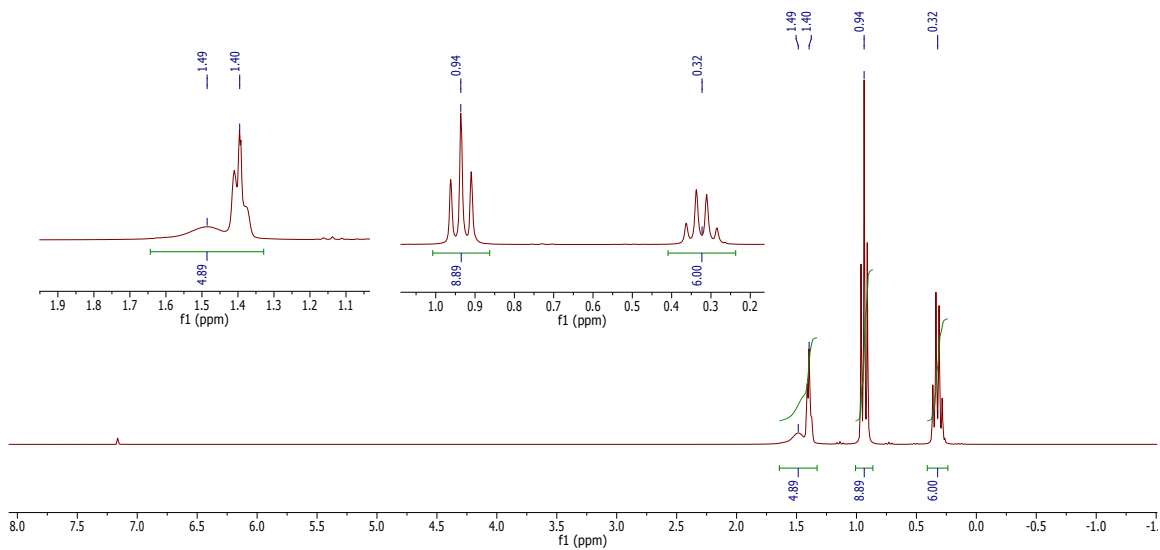

**Figure S4.**  $^1\text{H}$  NMR spectrum of  $\text{Et}_3\text{B}\cdot\text{NH}_2\text{Me}$  in  $\text{C}_6\text{D}_6$  (25 °C,  $[\text{D}_6]$ benzene, 300.13 MHz).

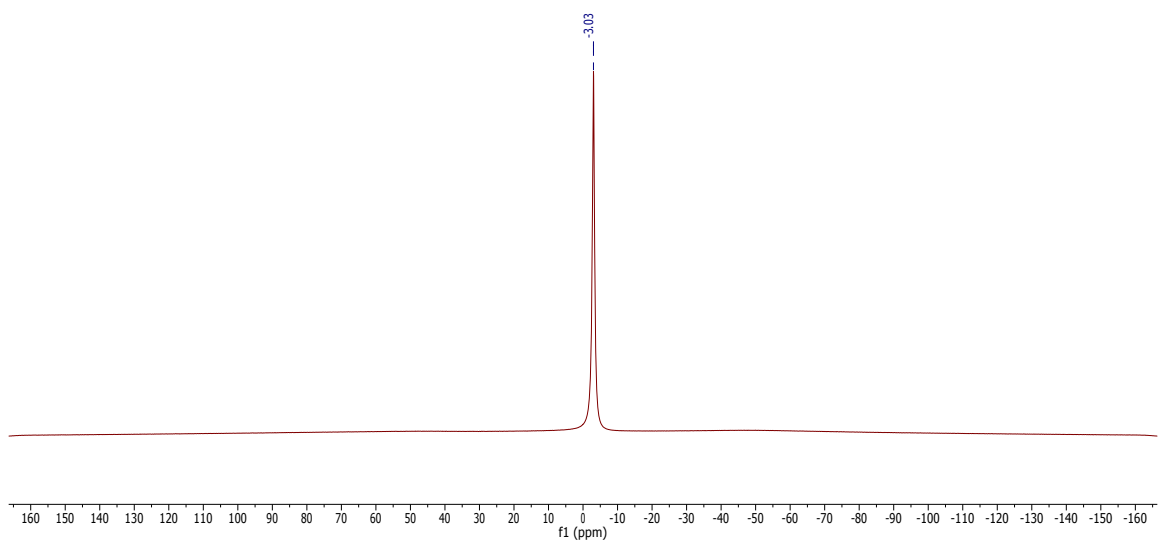

**Figure S5.**  $^{11}\text{B}\{^1\text{H}\}$  NMR spectrum of  $\text{Et}_3\text{B}\cdot\text{NH}_2\text{Me}$  in  $\text{C}_6\text{D}_6$  (25 °C,  $[\text{D}_6]$ benzene, 96.32 MHz).

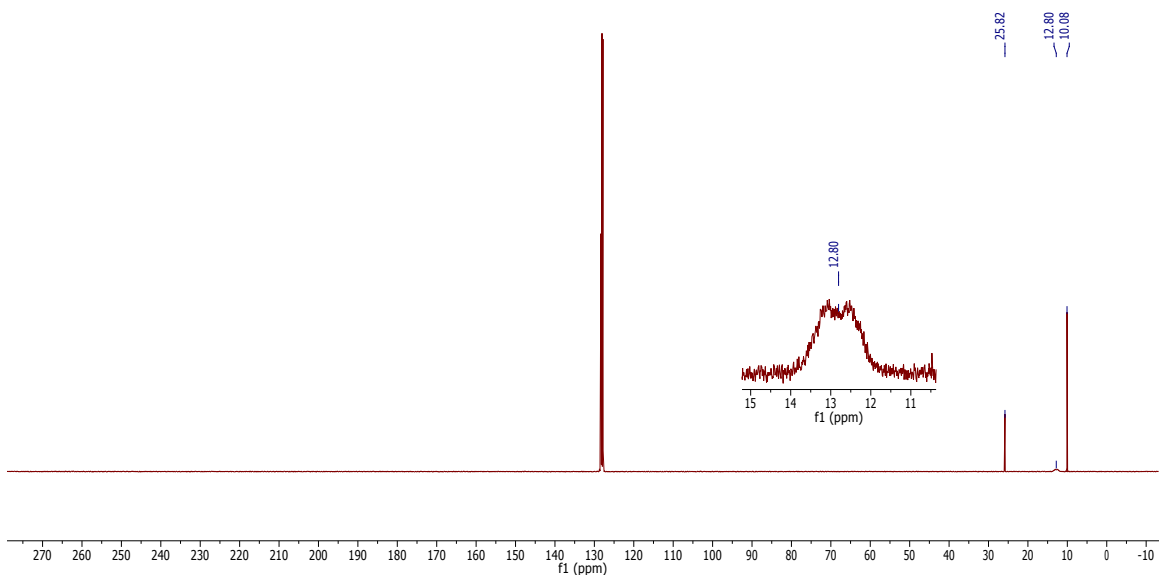

**Figure S6.** <sup>13</sup>C NMR spectrum of Et<sub>3</sub>B·NH<sub>2</sub>Me in C<sub>6</sub>D<sub>6</sub> (25 °C, [D<sub>6</sub>]benzene, 100.63 MHz).

### Preparation of deuterated methylamine boranes H<sub>3</sub>B·NMeD<sub>2</sub> and D<sub>3</sub>B·NMeH<sub>2</sub>

H<sub>3</sub>B·NMeD<sub>2</sub> was prepared according to a literature procedure.<sup>[8]</sup> D<sub>3</sub>B·NMeH<sub>2</sub> was prepared from D<sub>3</sub>B·NMe<sub>3</sub> according to a literature procedure.<sup>[9]</sup> D<sub>3</sub>B·NMe<sub>3</sub> was prepared by deuteration of H<sub>3</sub>B·NMe<sub>3</sub> (500 mg, 6.85 mmol) in THF (25 mL) using [(dppp)Rh(nbd)][BF<sub>4</sub>] (57 mg, 1.5 mol%) as the catalyst. Deuteration was done at room temperature under 30 bar D<sub>2</sub>, followed by transfer of the solution into an oven-dried Schlenk flask and THF removed under a stream of argon at room temperature. The solid was sublimed under static vacuum at room temperature to yield pure H<sub>3</sub>B·NMe<sub>3</sub> (220 mg, 44%). Spectroscopic data are in accordance with the literature.<sup>[8]</sup>

## 2. Catalytic tests

### General procedure for dehydropolymerisation experiments

Methylamine borane (MAB, 60 mg, 1.33 mmol) and the corresponding Zr catalyst were weighed in the glovebox and transferred to a three-necked reaction vessel. Then, the MAB containing dehydrogenation vessel was connected to the gas burette under Ar atmosphere. The gas burette was initialised and MAB and Zr catalyst were dissolved in 5 mL of toluene. The MeLi solution (0.08M in Et<sub>2</sub>O) was transferred to the reaction vessel and data acquisition was started immediately. After completion of the dehydrogenation reaction, a gas sample was taken and analyzed by GC-TCD and an aliquot was analyzed by <sup>11</sup>B NMR spectroscopy. The reaction solution was cannula-transferred into an oven dried Schlenk flask under Ar flow and the volume of solution was reduced to half of its volume. The polymer was obtained by precipitation into 50 mL of cold (-78 °C) *n*-hexane, allowed to precipitate for 30 minutes and subsequently filtered. The white solid was dried in vacuum overnight. Isolated yields varied from 55 % to 58 %. Details of the experimental setup were published before.<sup>[10]</sup>



## Catalyst screening

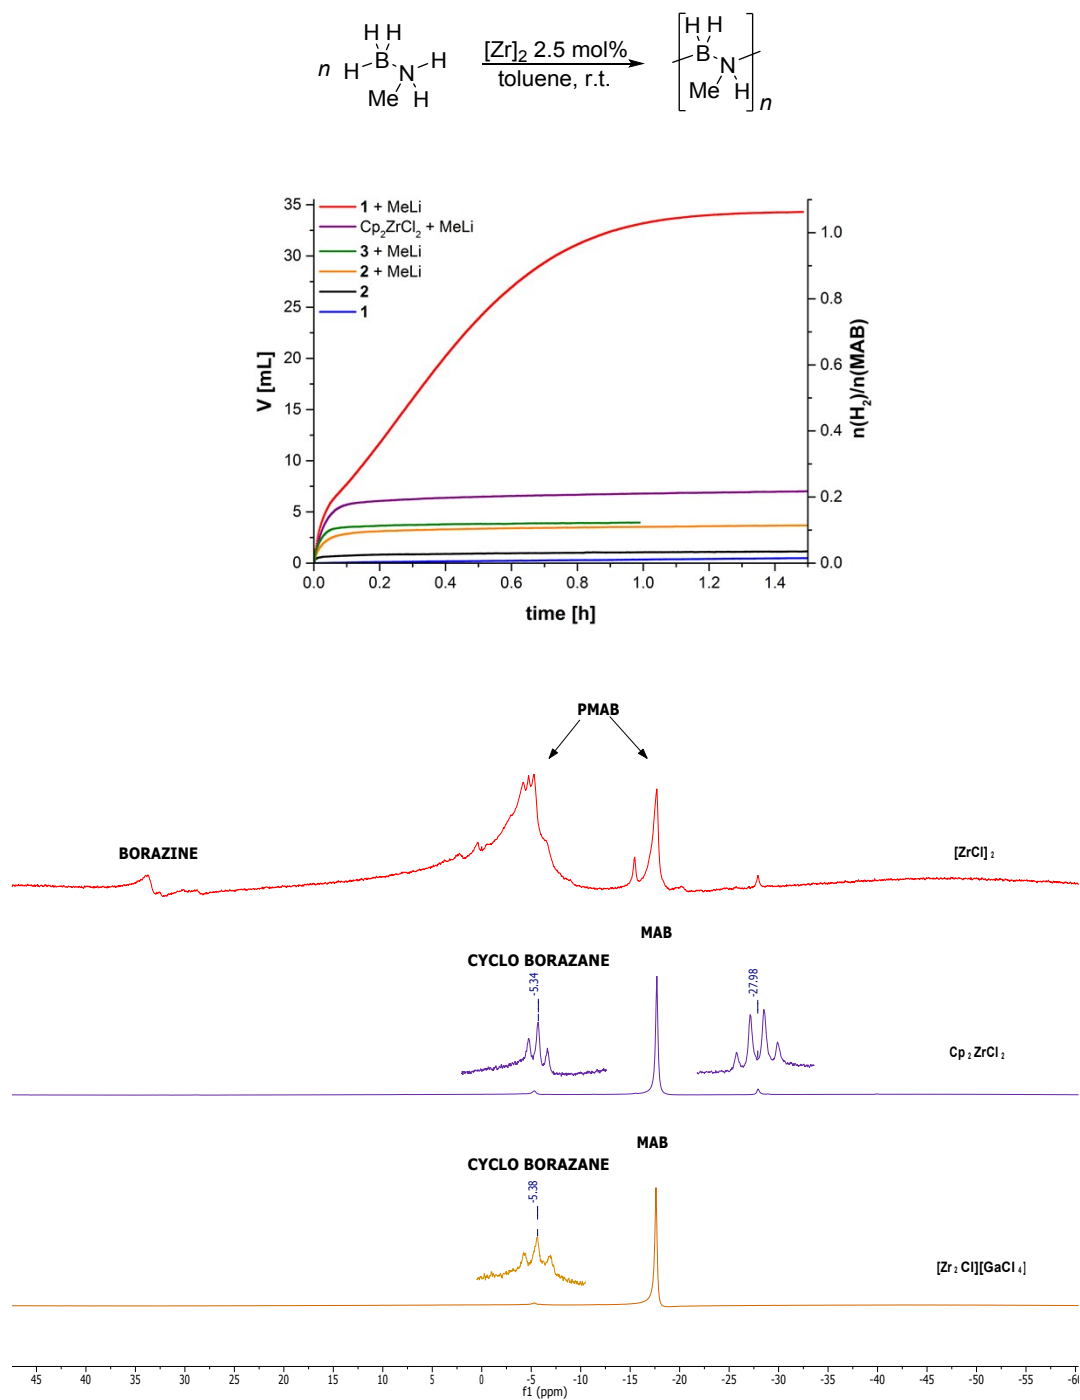

**Figure S7.** Volumetric curves of MAB dehydrogenative polymerisation with zirconocene complexes (top).  $^{11}\text{B}\{^1\text{H}\}$  NMR (25 °C,  $[\text{D}_6]$ benzene, 96.32 MHz) spectra of the crude reaction mixture (bottom). Reaction conditions: MAB (1.33 mmol), **1** (2.5 mol%) or  $\text{Cp}_2\text{ZrCl}_2$  (5 mol%), MeLi (5.5 mol%) in toluene (5 mL) at 25 °C. Note: Formation of cycloborazane ( $\delta^{11}\text{B} = -5.2$  ppm) and remaining starting material ( $\delta^{11}\text{B} = -18$  ppm) cannot be excluded for the spectra obtained from reactions using **1** due to the overlapping of their signals with those of the polymer.

## Variation of catalyst loading

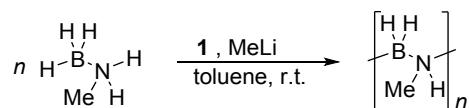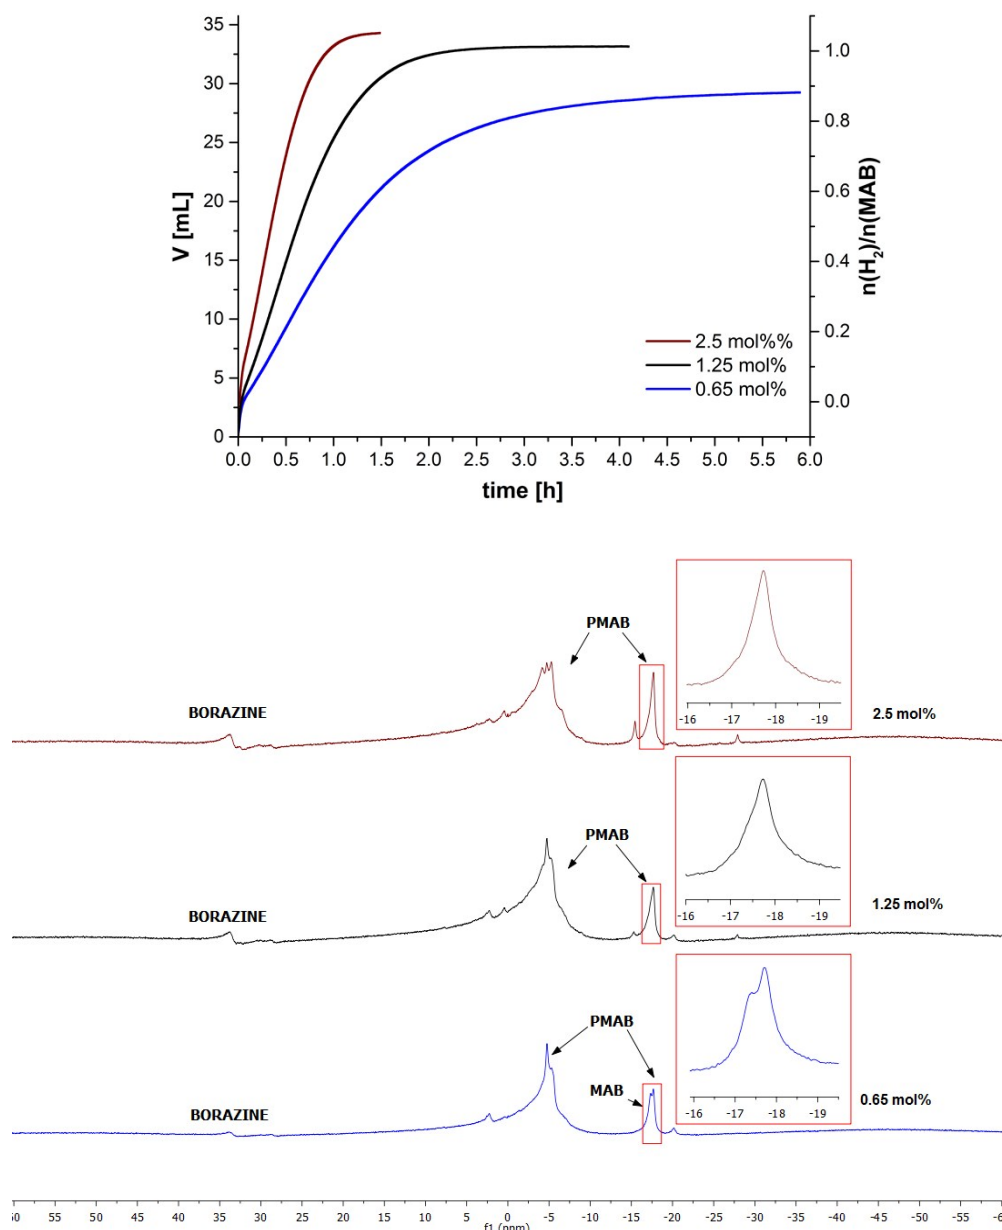

**Figure S8.** Volumetric curves of MAB dehydropolymerisation with different amount of **1** (top).  $^{11}\text{B}\{^1\text{H}\}$  NMR spectra of the crude reaction mixture (bottom, 25 °C,  $[\text{D}_6]$ benzene, 96.32 MHz). Reaction conditions: MAB (1.33 mmol), **1** (0.65-2.5 mol%), MeLi (1.4-5.5mol%) in toluene (5 mL) at 25 °C. *Note: Formation of cycloborazine ( $\delta^{11}\text{B} = -5.2$  ppm) is not detectable due to its overlapping with the polymer main-chain signal. Remaining starting material ( $\delta^{11}\text{B} = -18$  ppm) cannot be excluded due to the overlapping of its signal with those of the polymer end-chain. Residual MAB was present in reactions from which less than one equivalent of hydrogen evolved.*

### Dehydropolymerisation of MAB catalyzed by **1** with Li[MeNH·BH<sub>3</sub>]

MAB (60 mg, 1.33 mmol) and **1** (11.56 mg, 1.25 mol%) were weighed in the glovebox and transferred to a three-necked reaction vessel. Li[MeNH·BH<sub>3</sub>] (1.9 mg, 2.75 mol%) was weighed in the glovebox and transferred to Schlenk flask. Then, the MAB containing dehydrogenation vessel was connected to the gas burette under Ar atmosphere. The gas burette was initialised and MAB was dissolved in 5 mL of toluene. Li[MeNH·BH<sub>3</sub>] was dissolved in 0.5 mL of Et<sub>2</sub>O and this solution was added to the reaction vessel and data acquisition was started immediately. After completion of the dehydrogenation reaction, a gas sample was taken and analyzed by GC-TCD and an aliquot was analyzed by <sup>11</sup>B NMR spectroscopy (Figure S9).

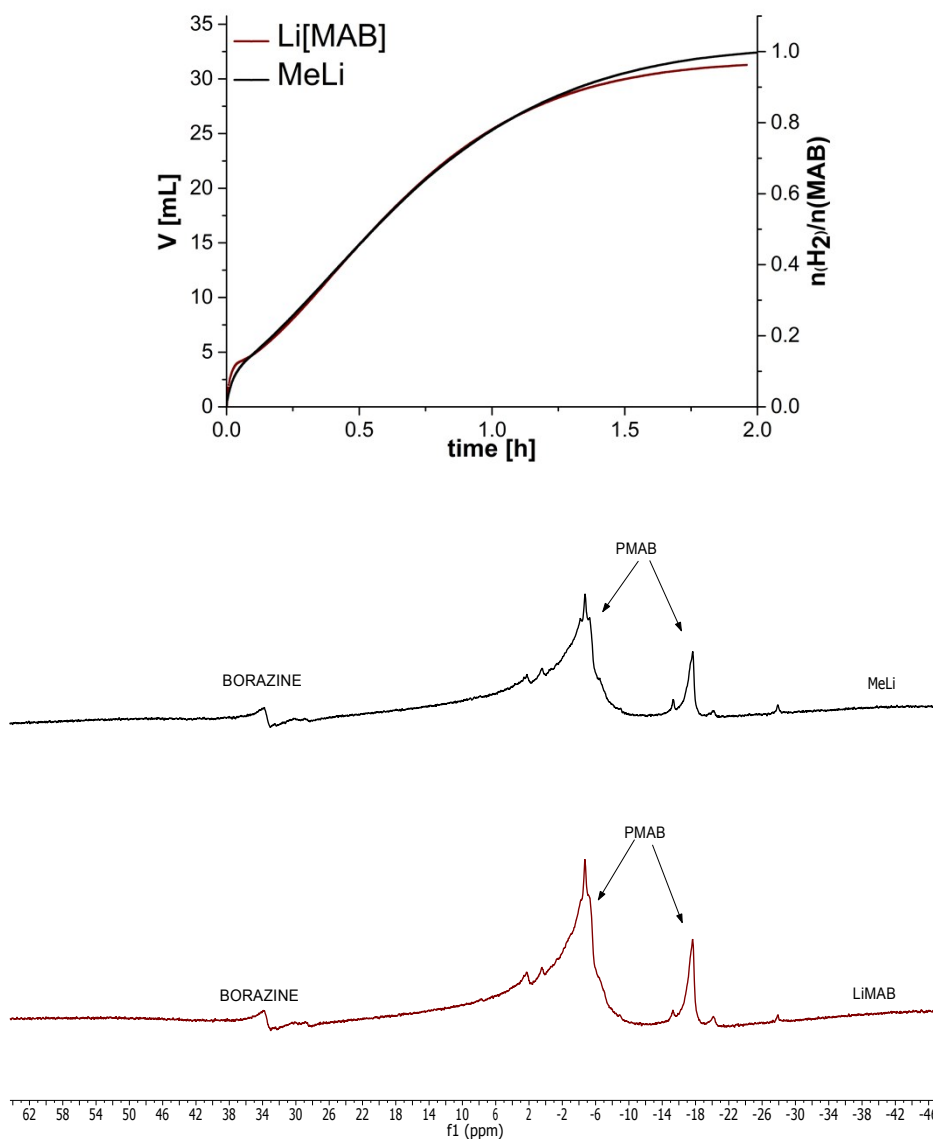

**Figure S9.** Comparison of the volumetric curve (top) and <sup>11</sup>B{<sup>1</sup>H} NMR spectra of catalytic dehydropolymerisation of MAB with MeLi or Li[MAB] (bottom, 25 °C, [D<sub>6</sub>]benzene, 96.32 MHz). Reaction conditions: MAB (1.33 mmol), **1** (1.25 mol%), MeLi or Li[MeNH·BH<sub>3</sub>] (2.75 mol%) in toluene (5 mL) at 25 °C.

## Reaction with *n*-BuLi

MAB (60 mg, 1.33 mmol) and **1** (11.56 mg, 1.25 mol%) were weighed in the glovebox and transferred to a three-necked reaction vessel. Then, the MAB containing dehydrogenation vessel was connected to the gas burette under Ar atmosphere. The gas burette was initialised and MAB and **1** catalyst were dissolved in 5 mL of toluene. Then 0.46 mL of a *n*-BuLi solution (0.08 M in hexane, 2.75 mol%) were added to the reaction vessel and data acquisition was started immediately. After completion of the dehydrogenation reaction, a gas sample was taken and analyzed by GC-TCD, which show only H<sub>2</sub> produced, and an aliquot was analyzed by <sup>11</sup>B NMR spectroscopy. The reaction solution was cannula-transferred into an oven dried Schlenk flask under Ar flow and the volume of solution was reduced to half of its volume. The polymer was obtained by precipitation into 50 mL of cold (-78 °C) *n*-hexane, allowed to precipitate for 30 minutes and subsequently filtered. The waxy yellowish solid was dried in vacuum overnight affording 32% isolated yield.

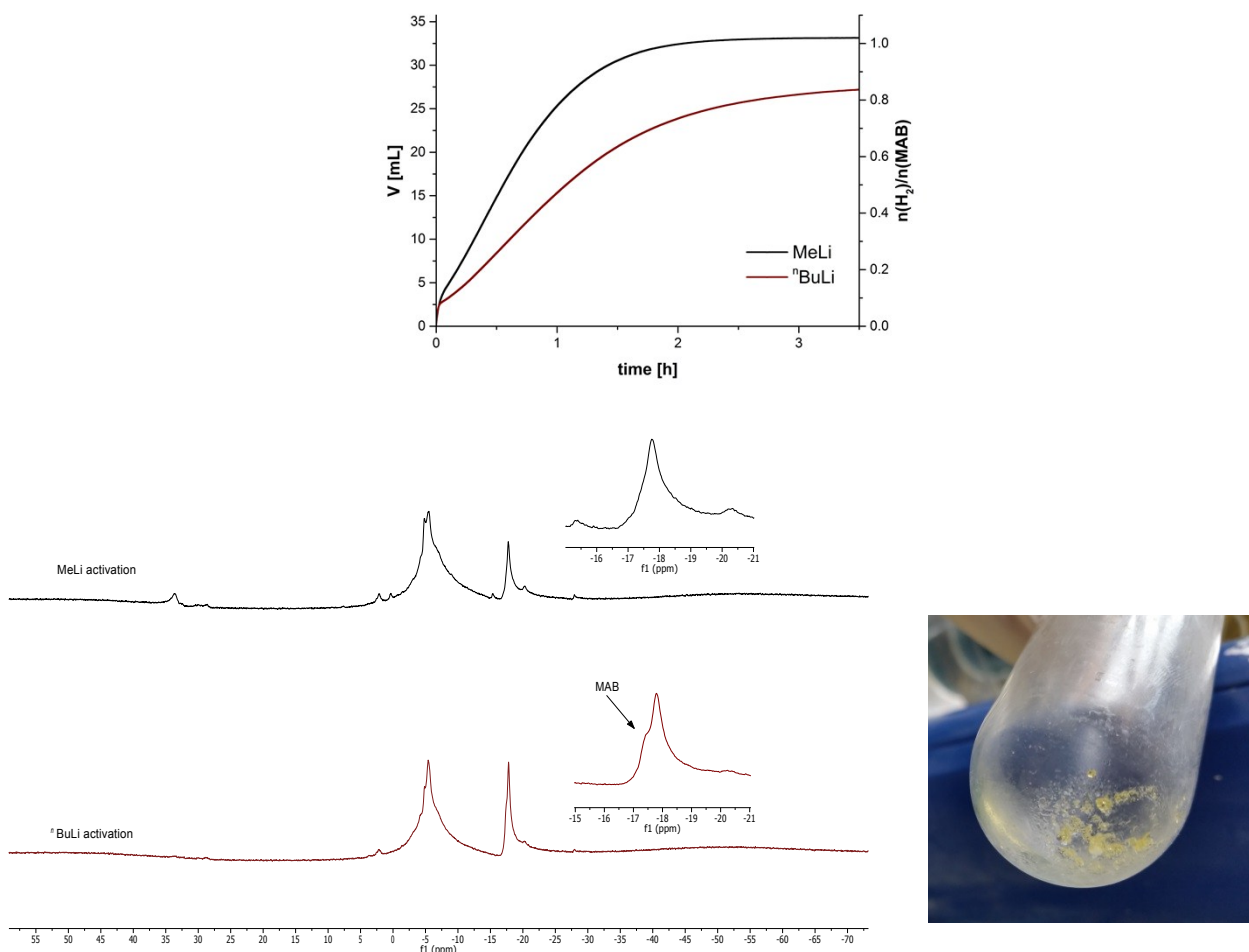

**Figure S10.** Comparison of the volumetric curve (top) and <sup>11</sup>B{<sup>1</sup>H} NMR spectra of catalytic dehydropolymerisation of MAB with activation using MeLi and *n*-BuLi (bottom left, 25 °C, [D<sub>6</sub>]benzene, 96.32 MHz). Isolated waxy material from the reaction with *n*-BuLi (bottom right). Reaction conditions: MAB (1.33 mmol), **1** (1.25 mol%), MeLi or *n*-BuLi (2.75 mol%) in toluene (5 mL) at 25 °C.

## Poisoning experiment

MAB (60 mg, 1.33 mmol) and **1** (11.56 mg, 1.25 mol%) were weighed in the glovebox and transferred to a three-necked reaction vessel. Then, the MAB containing dehydrogenation vessel was connected to the gas burette under Ar atmosphere. The gas burette was initialised and MAB and **1** catalyst were dissolved in 5 mL of toluene. Then 0.46 mL of a MeLi solution (0.08M in Et<sub>2</sub>O, 2.75 mol%) were added to the reaction vessel and data acquisition was started immediately. After a conversion of approximately 30%, 50 equivalents of mercury (1 mL, 13.5 g, 66.65 mmol) were transferred into the reaction solution via syringe and hydrogen gas evolutions was found to continue (Figure S11).

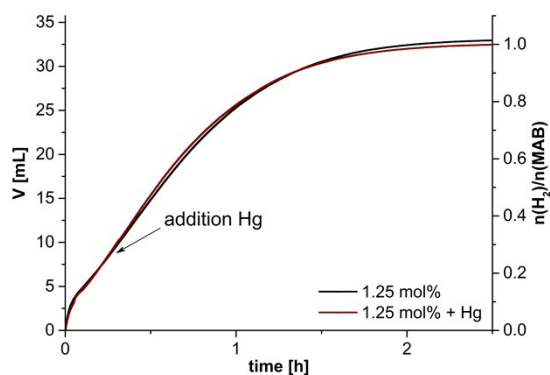

**Figure S11.** Comparison of the volumetric curve of catalytic dehydropolymerisation of MAB with and without addition of mercury. Reaction conditions: MAB (1.33 mmol), **1** (1.25 mol%), MeLi (2.75 mol%), Hg (10 equiv.) in toluene (5 mL) at 25 °C.

### Trapping the aminoborane [MeNH=BH<sub>2</sub>] in the presence of cyclohexene

MAB (60 mg, 1.33 mmol) and **1** (11.56 mg, 1.25 mol%) were weighed in the glovebox and transferred to a three-necked reaction vessel. Then, the MAB containing dehydrogenation vessel was connected to the gas burette under Ar atmosphere. The gas burette was initialised and MAB and **1** were dissolved in 4 mL of toluene. A solution of cyclohexene (109.3 mg, 1.33 mmol) in toluene (1 mL) was added to the reaction vessel, followed by 0.46 mL of a MeLi solution (0.08 M in Et<sub>2</sub>O, 2.75 mol%) and data acquisition was started immediately. After completion of the dehydrogenation reaction an aliquot was analyzed by <sup>11</sup>B NMR spectroscopy. The <sup>11</sup>B NMR spectrum did not show signals for MeNH=BCy<sub>2</sub> (Figure S12, highlighted area indicates the expected region for the hydroboration product) and the addition of cyclohexene does not affect catalyst activity and product distribution.

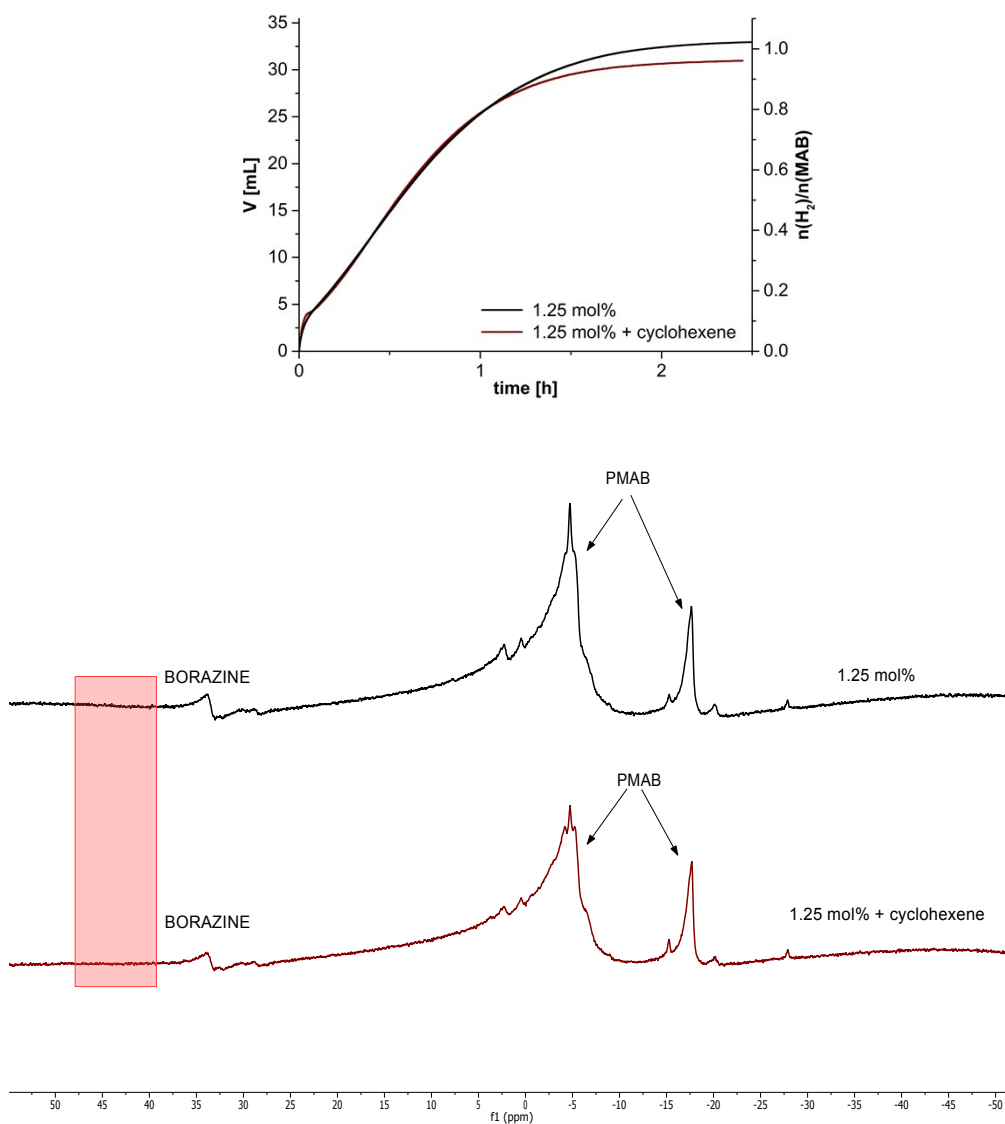

**Figure S12.** Comparison of the volumetric curve (top) and <sup>11</sup>B{<sup>1</sup>H} NMR spectra of catalytic dehydropolymerisation of MAB with and without cyclohexene (bottom, 25 °C, [D<sub>6</sub>]benzene, 96.32 MHz). Reaction conditions: MAB (1.33 mmol), **1** 1.25 mol%, MeLi (2.75 mol%), cyclohexene (1.33 mmol) in toluene (5 mL) at 25 °C.

## KIE experiments

$\text{H}_3\text{B}\cdot\text{NMeD}_2$  or  $\text{D}_3\text{B}\cdot\text{NMeH}_2$  (63 mg, 1.33 mmol) and **1** (11.56 mg, 1.25 mol%) were weighed in the glovebox and transferred to a three-necked reaction vessel. Then, the amine borane containing dehydrogenation vessel was connected to the gas burette under Ar atmosphere. The gas burette was initialised and  $\text{H}_3\text{B}\cdot\text{NMeD}_2$  or  $\text{D}_3\text{B}\cdot\text{NMeH}_2$  and precatalyst **1** were dissolved in 5 mL of toluene. Then 0.46 mL of a MeLi solution (0.08M in  $\text{Et}_2\text{O}$ , 2.75 mol%) were added to the reaction vessel and data acquisition was started immediately (Figure S13).

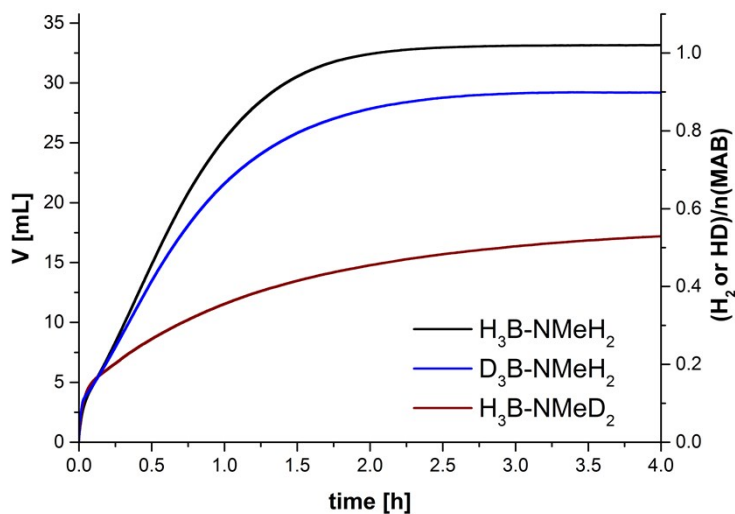

**Figure S13.** Comparison of the volumetric curve of catalytic dehydropolymerisation of MAB,  $\text{H}_3\text{B}\cdot\text{NMeD}_2$  and  $\text{D}_3\text{B}\cdot\text{NMeH}_2$ .

### 3. Polymer characterisation

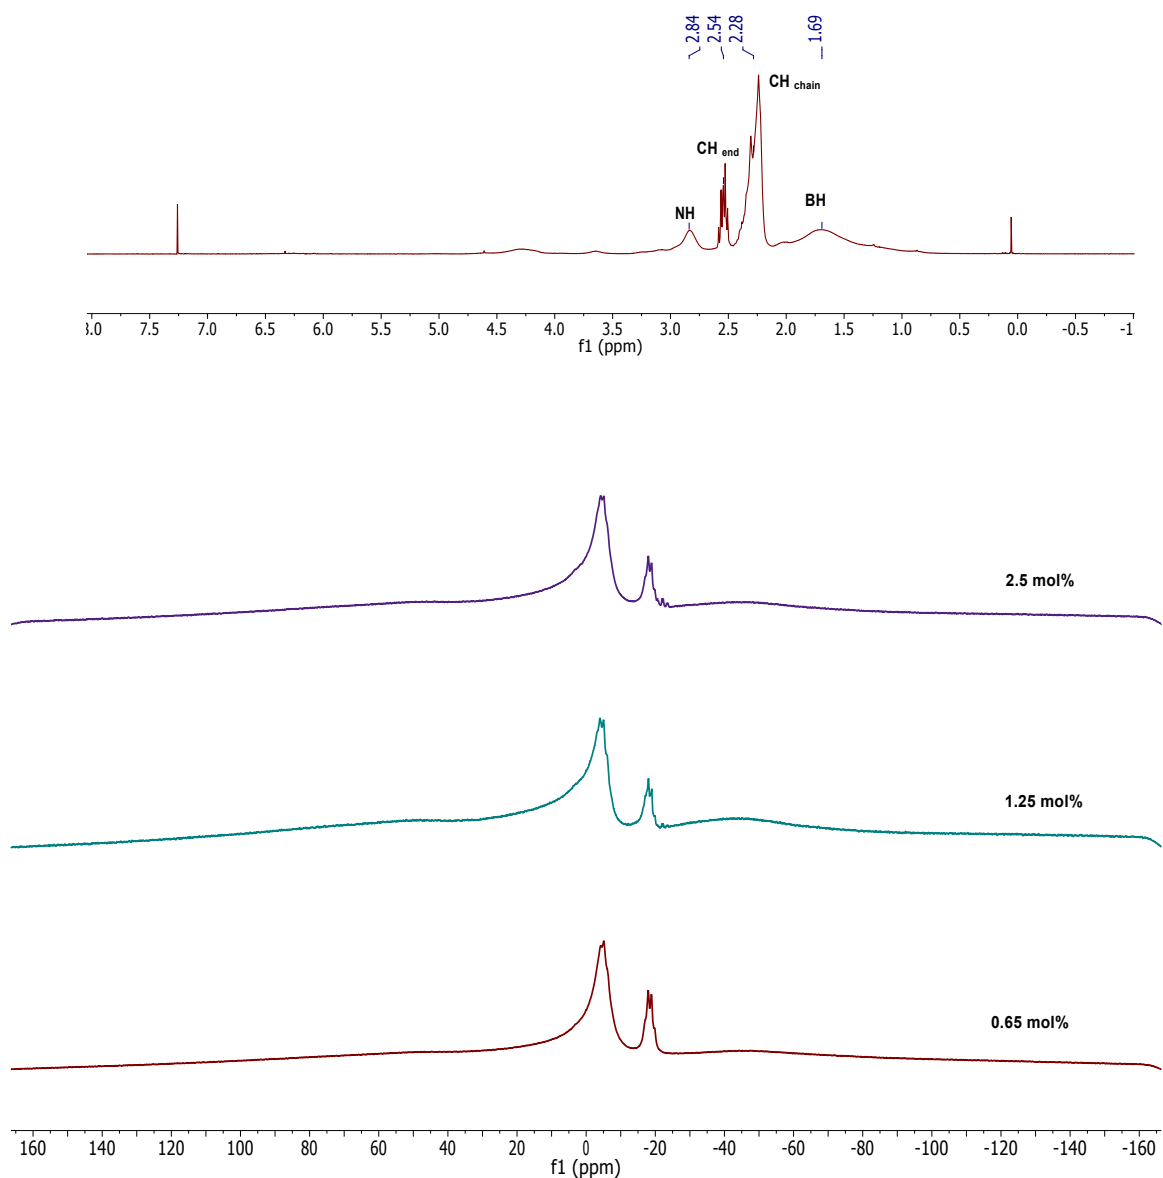

**Figure S14.**  $^1\text{H}$  NMR spectrum (25 °C,  $\text{CDCl}_3$ , 300.13 MHz) of a representative sample of isolated PMAB (top) and  $^{11}\text{B}\{^1\text{H}\}$  NMR spectra (25 °C,  $\text{CDCl}_3$ , 96.32 MHz) of isolated PMABs at different catalyst loadings (bottom). Note: Remaining cycloborazane ( $\delta^{11}\text{B} = -5.2$  ppm) and starting material ( $\delta^{11}\text{B} = -18$  ppm) cannot be excluded due to the overlapping of their signals with those of the polymer.



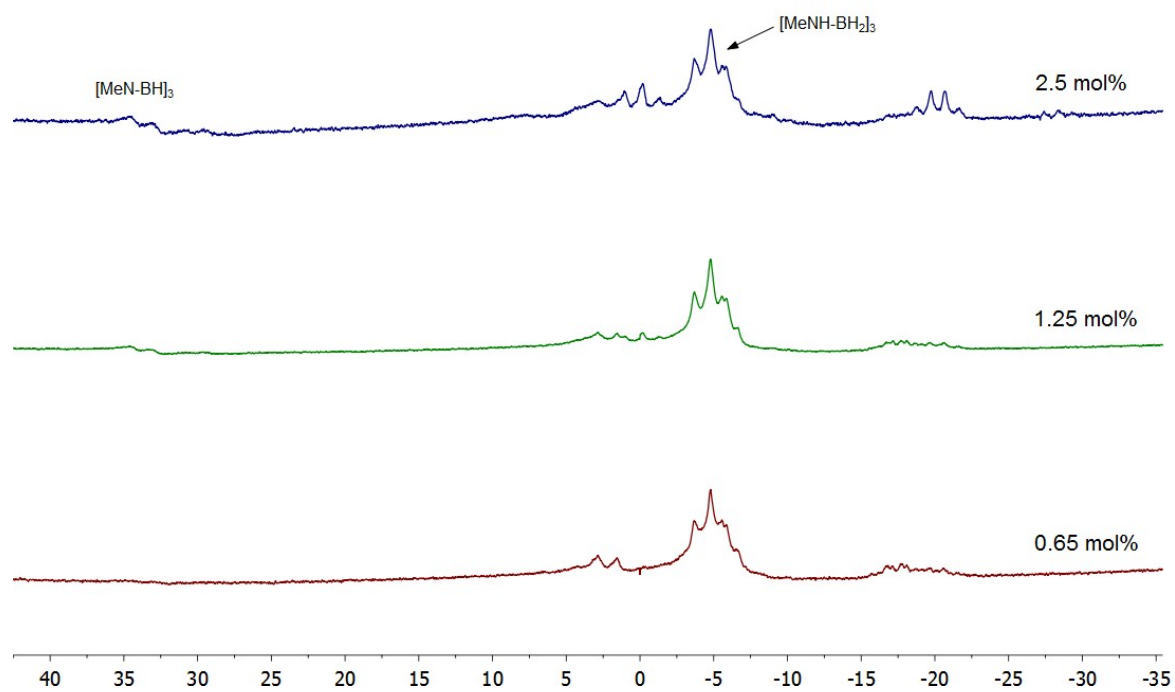

**Figure S15.**  $^{11}\text{B}\{^1\text{H}\}$  NMR spectra (25 °C,  $\text{CDCl}_3$ , 96.3 MHz) of the *n*-hexane phase after precipitation of the polymer at different catalyst loadings.

## SEC analysis

2.5 mol% catalyst loading

a)  $c = 1.96 \text{ mg/mL}$

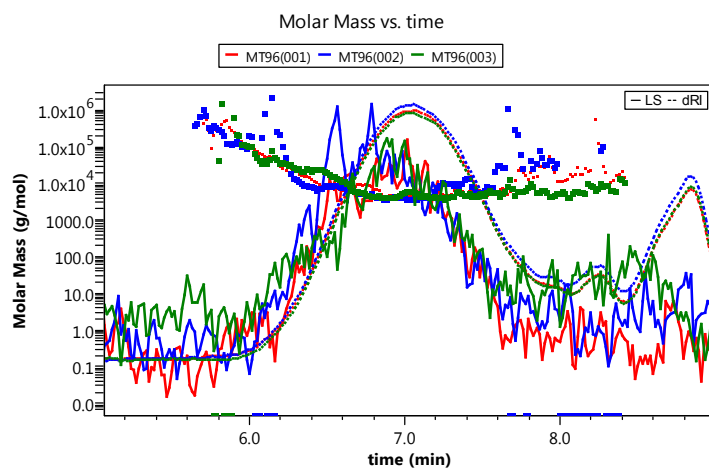

b)  $c = 4.35 \text{ mg/mL}$

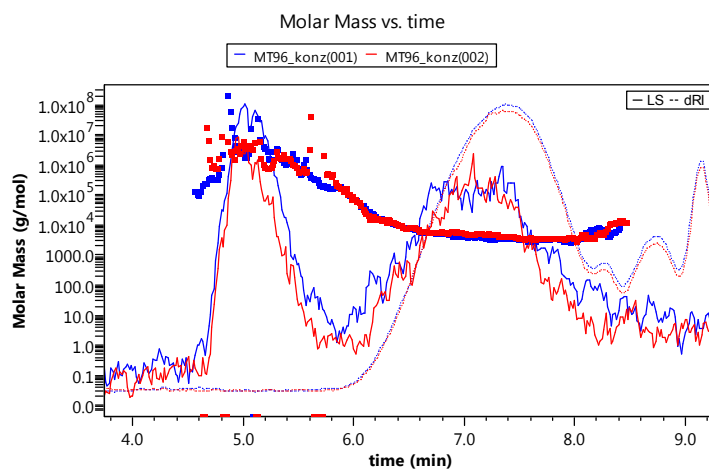

**Figure S16.** Chromatogram at a) low and b) higher concentration, duplicate injections, molar mass, MALLS and RI signal vs. elution time (2.5 mol% catalyst loading)

**Table S1.** Average molar mass and molar mass dispersities measured by SEC-MALLS at two different concentrations (2.5 mol% catalyst loading).

| Measure-<br>ment | $M_n$<br>(g·mol <sup>-1</sup> ) | $M_w$<br>(g·mol <sup>-1</sup> ) | $\bar{D}$<br>( $M_w/M_n$ ) | $M_n$<br>(g·mol <sup>-1</sup> ) | $M_w$<br>(g·mol <sup>-1</sup> ) | $\bar{D}$<br>( $M_w/M_n$ ) |
|------------------|---------------------------------|---------------------------------|----------------------------|---------------------------------|---------------------------------|----------------------------|
| c = 1.96 mg/mL   |                                 |                                 | c = 4.35mg/mL              |                                 |                                 |                            |
| <b>1</b>         | 6020±2400                       | 8770±3490                       | 1,46                       | 3920±370                        | 5530±503                        | 1,41                       |
| <b>2</b>         | 5600±2300                       | 7810±3210                       | 1,39                       | 4530±580                        | 6110±780                        | 1,35                       |
| <b>3</b>         | 5.500±2130                      | 7560±2930                       | 1,38                       |                                 |                                 |                            |
| <b>Average</b>   | <b>5710±2280</b>                | <b>8050±3210</b>                | <b>1,41</b>                | <b>4220±470</b>                 | <b>5820±650</b>                 | <b>1,38</b>                |

1.25 mol% catalyst loading

a)  $c = 2.01 \text{ mg/mL}$

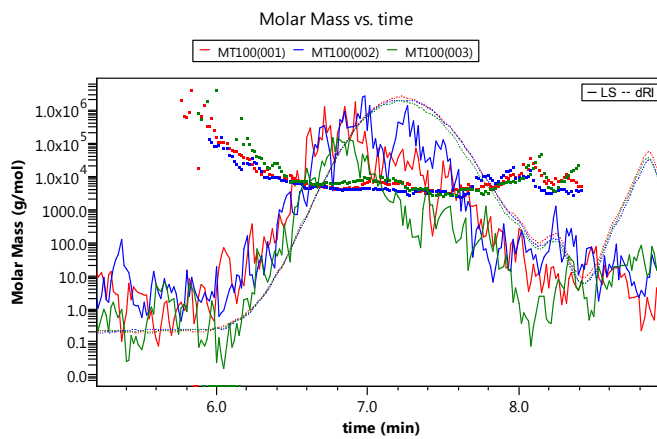

b)  $c = 4.18 \text{ mg/mL}$

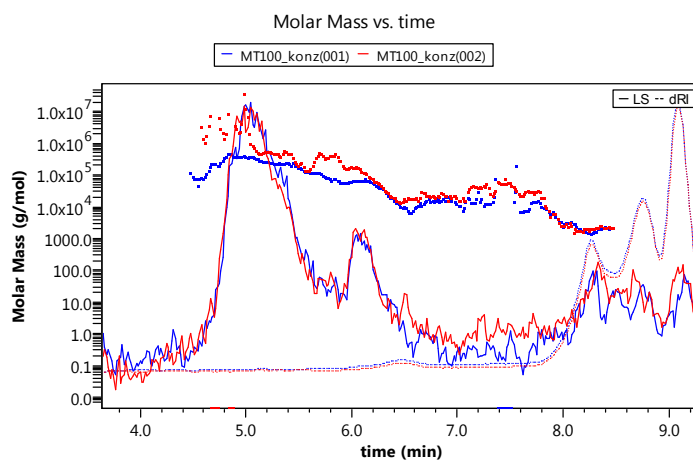

**Figure S17.** Chromatogram at a) low and b) higher concentration, duplicate, molar mass, LS and RI signal vs. elution time.

**Table S2.** Average molar mass and molar mass dispersities measured by SEC-MALLS at two different concentrations (1.25 mol% catalyst loading).

| Measure-<br>ment | $M_n$<br>( $\text{g}\cdot\text{mol}^{-1}$ ) | $M_w$<br>( $\text{g}\cdot\text{mol}^{-1}$ ) | $\mathfrak{D}$<br>( $M_w/M_n$ ) | $M_n$<br>( $\text{g}\cdot\text{mol}^{-1}$ ) | $M_w$<br>( $\text{g}\cdot\text{mol}^{-1}$ ) | $\mathfrak{D}$<br>( $M_w/M_n$ ) |
|------------------|---------------------------------------------|---------------------------------------------|---------------------------------|---------------------------------------------|---------------------------------------------|---------------------------------|
| c = 2.01 mg/mL   |                                             |                                             | c = 4.18 mg/mL                  |                                             |                                             |                                 |
| <b>1</b>         | 5140±1800                                   | 6370±2240                                   | 1,24                            | 2410±380                                    | 14600±2310                                  | 6,07                            |
| <b>2</b>         | 4105±1510                                   | 5,15±1,88                                   | 1,24                            | 2440±390                                    | 16000±2530                                  | 6,57                            |
| <b>3</b>         | 5100±1560                                   | 6710±2050                                   | 1,32                            |                                             |                                             |                                 |
| <b>Average</b>   | <b>4790±1630</b>                            | <b>6080±2070</b>                            | <b>1,27</b>                     | <b>2430±380</b>                             | <b>15300±2420</b>                           | <b>6,32</b>                     |

0.65 mol% catalyst loading

a)  $c = 1.99 \text{ mg/mL}$

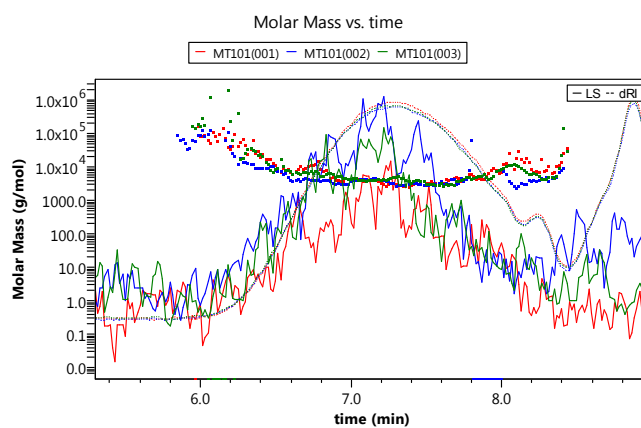

b)  $c = 4.27 \text{ mg/mL}$

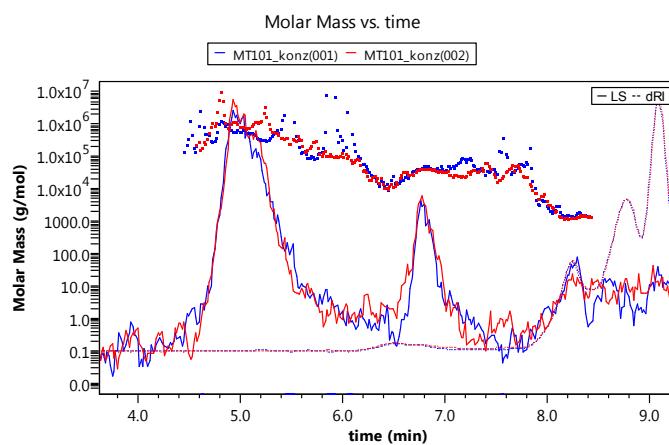

**Figure S18.** Chromatogram at a) low and b) higher concentration, duplicate, molar mass, LS and RI signal vs. elution time.

**Table S3.** Average molar mass and molar mass dispersities measured by SEC-MALLS at two different concentrations (0.65 mol% catalyst loading).

| Measure-<br>ment | $M_n$<br>(g·mol <sup>-1</sup> ) | $M_w$<br>(g·mol <sup>-1</sup> ) | $\mathcal{D}$<br>( $M_w/M_n$ ) | $M_n$<br>(g·mol <sup>-1</sup> ) | $M_w$<br>(g·mol <sup>-1</sup> ) | $\mathcal{D}$<br>( $M_w/M_n$ ) |
|------------------|---------------------------------|---------------------------------|--------------------------------|---------------------------------|---------------------------------|--------------------------------|
| c = 1.99 mg/mL   |                                 |                                 | c = 4.27 mg/mL                 |                                 |                                 |                                |
| <b>1</b>         | 4450±2130                       | 5890±3040                       | 1,32                           | 2040±420                        | 15900±3310                      | 7,78                           |
| <b>2</b>         | 3690±1440                       | 4300±2000                       | 1,16                           | 1810±380                        | 13400±2790                      | 7,38                           |
| <b>3</b>         | 4650±1760                       | 5740±2540                       | 1,23                           |                                 |                                 |                                |
| <b>Average</b>   | <b>4270±1770</b>                | <b>5310±2520</b>                | <b>1,24</b>                    | <b>1930±400</b>                 | <b>14600±3040</b>               | <b>7,58</b>                    |

## 4. Stoichiometric test

### *In situ* reaction of **1**, MAB and MeLi·BrLi

Complex **1** (17 mg, 0.02 mmol) and MAB (3 mg, 0.05 mmol) were transferred into a J-Young NMR tube and dissolved in C<sub>6</sub>D<sub>6</sub> (0.7 mL). To this solution a solution of MeLi·BrLi (0.05 mmol, 0.03 mL) was added slowly at 0 °C. The colour of the reaction mixture gradually changed from orange to red within 15 minutes, then to brown within two hours and finally to petrol (> 15 h).

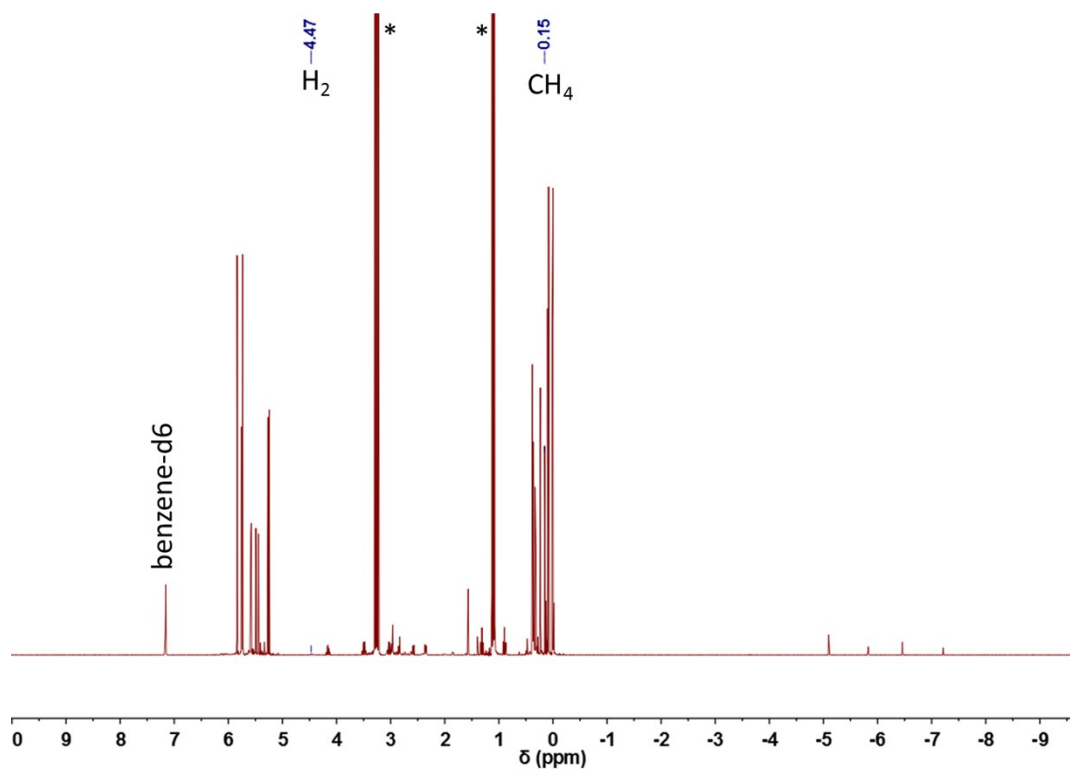

**Figure S19.** <sup>1</sup>H NMR spectrum (25 °C, [D<sub>6</sub>]benzene, 300.13 MHz) of the above *in situ* experiment showing the formation of H<sub>2</sub><sup>[11]</sup> and CH<sub>4</sub><sup>[10]</sup> in addition to a series of new unidentified zirconocene species. The four resonances found at higher field support the formation of Zr hydride species which were postulated as catalytically active intermediates. Asterisk marks diethyl ether of the MeLi·BrLi solution.



**Reaction of complex 1 and Li[MeNH·BH<sub>3</sub>]:**

**1** (23 mg, 0.033 mmol) and Li[MeNH·BH<sub>3</sub>] (3.4 mg, 0.033 mmol) were transferred into a J-Young NMR tube and C<sub>6</sub>D<sub>6</sub> (0.7 mL) was added. The reaction was monitored by <sup>1</sup>H and <sup>11</sup>B NMR spectroscopy. The colour of the reaction mixture gradually changed from orange to red within 15 minutes, then to brown within two hours and finally to petrol (> 15h).

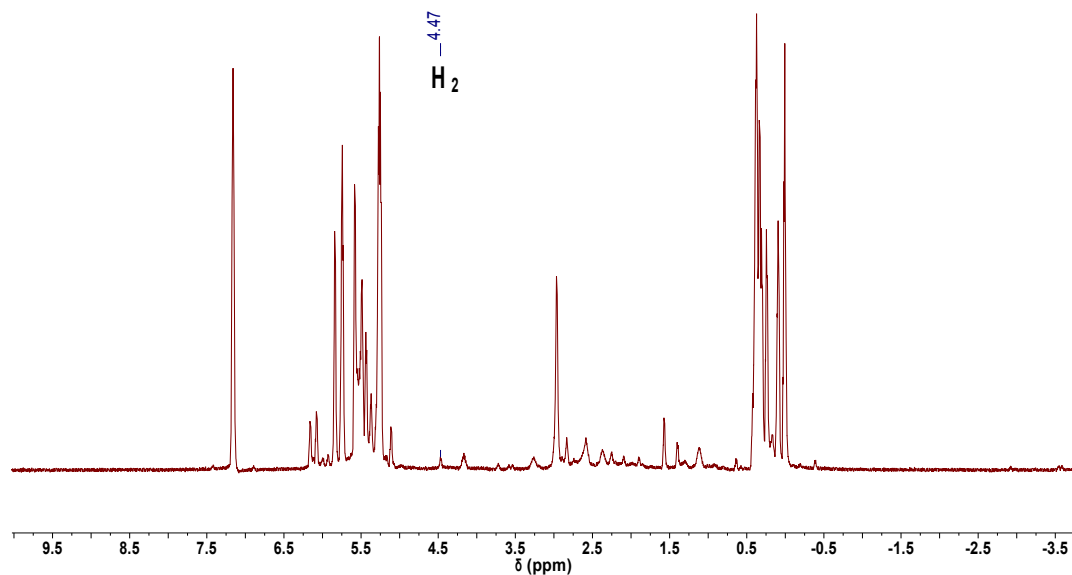

**Figure S20.** <sup>1</sup>H NMR spectrum (25 °C, [D<sub>6</sub>]benzene, 300.13 MHz) of the above *in situ* experiment showing the formation of H<sub>2</sub> in addition to a series on new unidentified zirconocene species.

## 5. Crystallographic details

**Table S4.** Crystallographic details of **2** and **4**.

|                                          | <b>2</b>                                                                                                         | <b>4</b>                                                        |
|------------------------------------------|------------------------------------------------------------------------------------------------------------------|-----------------------------------------------------------------|
| Chem. Formula                            | C <sub>29</sub> H <sub>38</sub> Cl <sub>5</sub> GaSi <sub>2</sub> Zr <sub>2</sub> ·C <sub>6</sub> H <sub>6</sub> | C <sub>31</sub> H <sub>44</sub> Si <sub>2</sub> Zr <sub>2</sub> |
| Form. Wght [g mol <sup>-1</sup> ]        | 950.29                                                                                                           | 655.28                                                          |
| Color                                    | orange                                                                                                           | yellow                                                          |
| Cryst. system                            | monoclinic                                                                                                       | orthorhombic                                                    |
| Space group                              | <i>P2<sub>1</sub>/c</i>                                                                                          | <i>P2<sub>1</sub>2<sub>1</sub>2<sub>1</sub></i>                 |
| a [Å]                                    | 9.8303(2)                                                                                                        | 10.9699(3)                                                      |
| b [Å]                                    | 21.7110(4)                                                                                                       | 17.2760(4)                                                      |
| c [Å]                                    | 19.0242(3)                                                                                                       | 32.6586(9)                                                      |
| α [°]                                    | 90                                                                                                               | 90                                                              |
| β [°]                                    | 94.3510(8)                                                                                                       | 90                                                              |
| γ [°]                                    | 90                                                                                                               | 90                                                              |
| V [Å <sup>3</sup> ]                      | 4048.55(13)                                                                                                      | 6189.3(3)                                                       |
| Z                                        | 4                                                                                                                | 8                                                               |
| ρ <sub>calc.</sub> [g cm <sup>-3</sup> ] | 1.559                                                                                                            | 1.406                                                           |
| μ [mm <sup>-1</sup> ]                    | 8.705                                                                                                            | 0.768                                                           |
| T [K]                                    | 150(2)                                                                                                           | 150(2)                                                          |
| radiation type                           | CuK\α                                                                                                            | MoK\α                                                           |
| reflections measured                     | 35215                                                                                                            | 89921                                                           |
| independent reflections                  | 7146                                                                                                             | 14925                                                           |
| observed reflections with I > 2σ(I)      | 6289                                                                                                             | 13905                                                           |
| R <sub>int.</sub>                        | 0.0417                                                                                                           | 0.0365                                                          |
| F(000)                                   | 1912                                                                                                             | 2704                                                            |
| R <sub>1</sub> (I > 2σ(I))               | 0.0681                                                                                                           | 0.0252                                                          |
| wR <sub>2</sub> (all data)               | 0.2005                                                                                                           | 0.0545                                                          |
| GOF on F <sup>2</sup>                    | 1.039                                                                                                            | 1.033                                                           |
| Parameters                               | 401                                                                                                              | 647                                                             |
| CCDC number                              | 1851926                                                                                                          | 1851927                                                         |

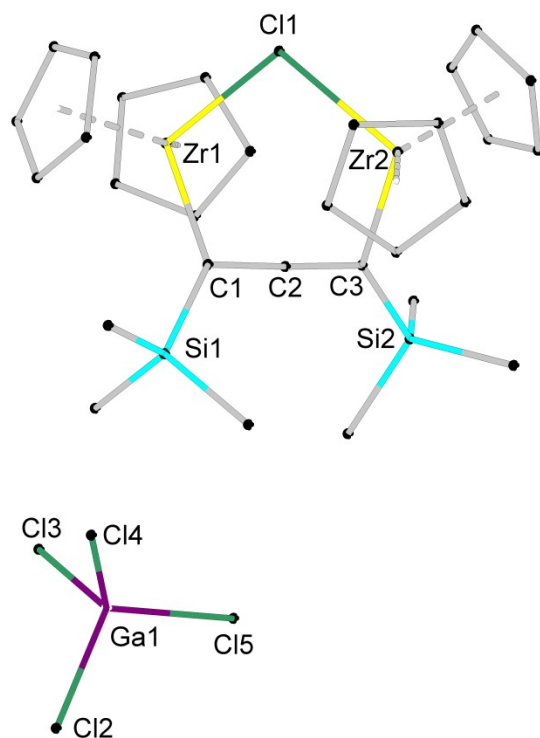

**Figure S21.** Structural motif of **2**, H atoms and benzene solvent molecule are omitted for clarity. Due to the very fast crystallisation of this compound only crystals of poor quality were obtained resulting in a  $R_1$  ( $I > 2\sigma(I)$ ) value of only 0.0681 and  $wR_2$  (all data) of 0.2005. Furthermore high residual electron density was observed (largest diff. peak:  $5.22 \text{ e}\cdot\text{\AA}^{-3}$   $1.14 \text{ \AA}$  from Si1 and deepest hole:  $-0.67 \text{ e}\cdot\text{\AA}^{-3}$   $0.74 \text{ \AA}$  from Zr1) Therefore no further details are reported and we only use the structural motif to confirm the formation of complex **2**.

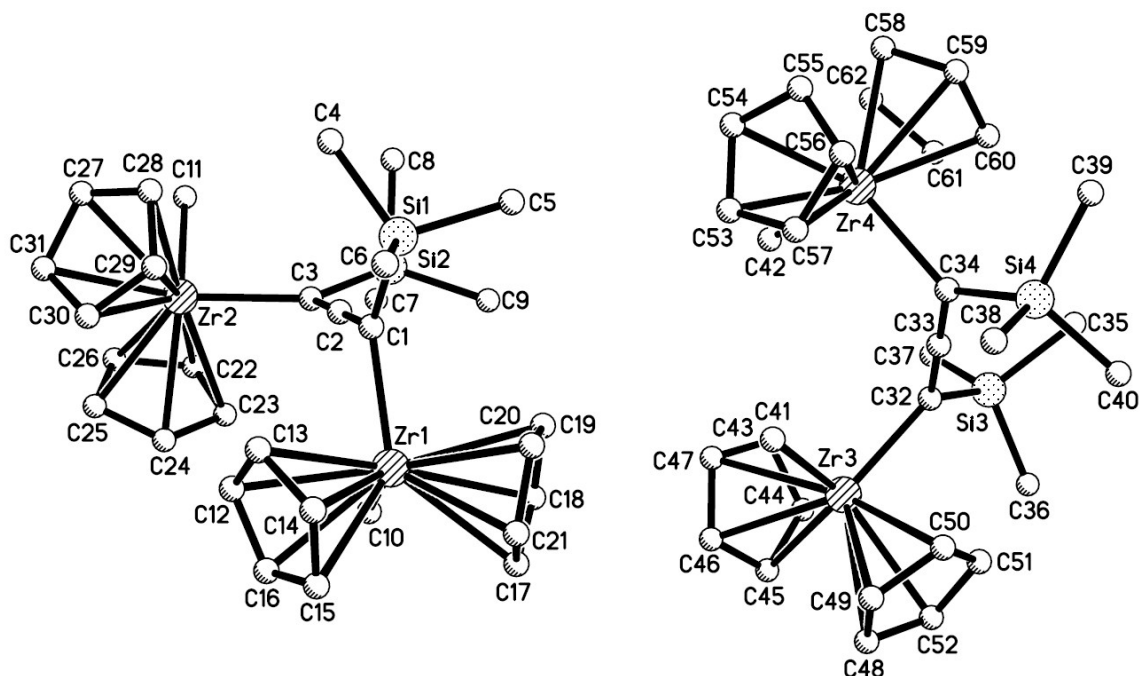

**Figure S22.** Numbering Scheme of **4**. Hydrogen atoms are omitted for clarity.

**Table S5.** Selected bond lengths (Å), angles (°) of **4**.

|                     |                       |                            |                           |
|---------------------|-----------------------|----------------------------|---------------------------|
| C1–C2/<br>C32–C33   | 1.310(4)/<br>1.310(4) | C1–C2–C3/<br>C32–C33–C34   | 178.6(3)/<br>179.2(3)     |
| C2–C3/<br>C33–C34   | 1.312(4)/<br>1.312(4) | C2–C1–Zr1/<br>C33–C32–Zr3  | 109.4(2)/<br>108.0(2)     |
| C1–Zr1/<br>C32–Zr3  | 2.280(3)/<br>2.286(3) | Si1–C1–Zr1/<br>Si3–C32–Zr3 | 130.80(16)/<br>132.45(15) |
| C10–Zr1/<br>C41–Zr3 | 2.273(3)/<br>2.260(3) | C10–Zr1–C1/<br>C41–Zr3–C32 | 104.46(13)/<br>104.75(11) |
| C3–Zr2/<br>C34–Zr4  | 2.286(3)/<br>2.271(3) | C2–C3–Si2/<br>C33–C34–Si4  | 110.8(2)/<br>119.7(2)     |
| C11–Zr2/<br>C42–Zr4 | 2.266(3)/<br>2.283(3) | C2–C3–Zr2/<br>C33–C34–Zr4  | 125.2(2)/<br>110.0(2)     |
| C1–Si1/<br>C32–Si3  | 1.852(3)/<br>1.849(3) | Si2–C3–Zr2/<br>Si4–C34–Zr4 | 123.34(15)/<br>129.99(16) |
| C3–Si2/<br>C34–Si4  | 1.869(3)/<br>1.848(3) | C11–Zr2–C3/<br>C34–Zr4–C42 | 99.28(12)/<br>105.34(12)  |

### Axial Chirality of compounds **1**, **2** and **4**.

Due to the allendiyl bridge in the examined complexes the molecules show an axial chirality. Compound **4** crystallized in the space group  $P2_12_12_1$  (Flack parameter  $x = -0.07(1)$ ) with both enantiomers in the asymmetric unit. **2** crystallized in the centrosymmetric space group  $P2_1/c$ , therefore **2** is racemic too. The recently published starting material **1** (space group  $Cc$ ) was also obtained as racemic mixture in the solid state. To demonstrate these enantiomers we show the capped stick representations of complexes **1**, **2** and **4**. For clarity H atoms, solvent molecules as well as the  $[GaCl_4]$  anion in the case of **2** were omitted.

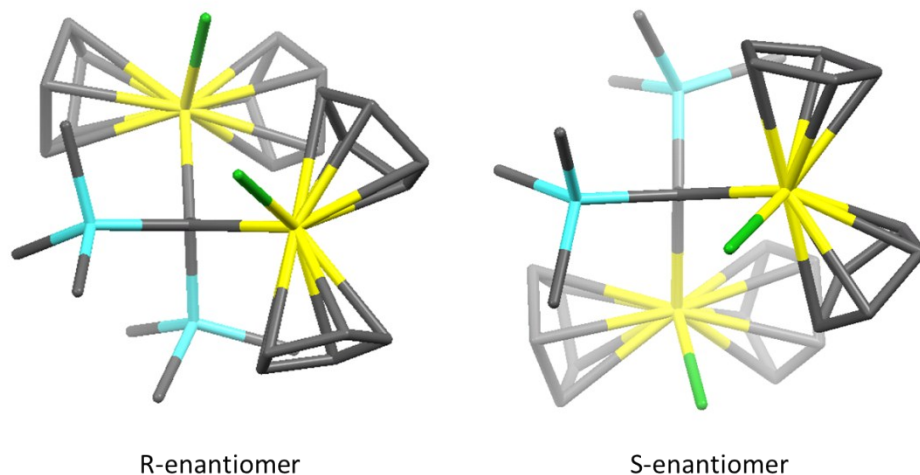

**Figure S23.** Representation of the R/S-isomers of **1**.

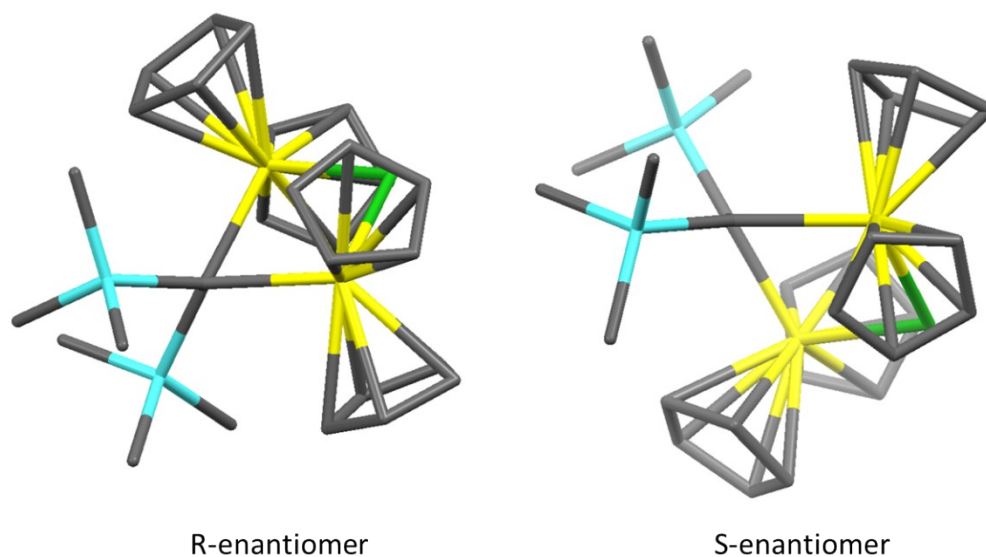

**Figure S24.** Representation of the R/S-isomers of **2**.

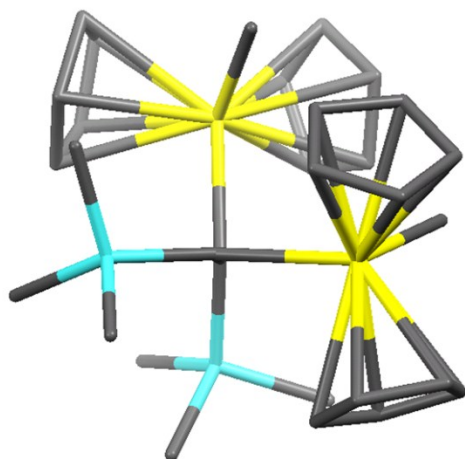

R-enantiomer

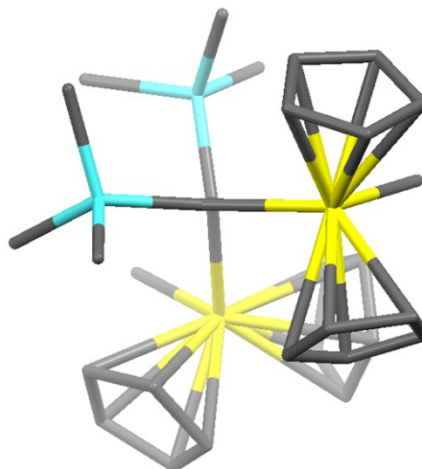

S-enantiomer

**Figure S25.** Representation of the R/S-isomers of **4**.

## 6. References

---

- [1] F. Reiß, M. Reiß, A. Spannenberg, H. Jiao, W. Baumann, P. Arndt, U. Rosenthal and T. Beweries, *Chem. Eur. J.*, 2018, **24**, 5667.
- [2] R. R. Schrock and J. A. Osborn, *J. Am. Chem. Soc.* 1971, **93**, 2397.
- [3] H. E. Gottlieb, V. Kotlyar and A. Nudelman, *J. Org. Chem.*, 1997, **62**, 7512.
- [4] G. M. Sheldrick, *Acta Cryst.*, 2008, **A64**, 112.
- [5] G. M. Sheldrick, *Acta Cryst.*, 2015, **C71**, 3.
- [6] Diamond - Crystal and Molecular Structure Visualisation, Crystal Impact - Dr. H. Putz & Dr. K. Brandenburg GbR, Kreuzherrenstr. 102, 53227 Bonn, Germany, <http://www.crystalimpact.com/diamond>.
- [7] Mercury - C. F. Macrae, P. R. Edgington, P. McCabe, E. Pidcock, G. P. Shields, R. Taylor, M. Towler, J. J. van de Streek, *Appl. Cryst.* 2006, **39**, 453.
- [8] H. C. Johnson, A. P. M. Robertson, A. B. Chaplin, L. J. Sewell, A. L. Thompson, M. F. Haddow, I. Manners and A. S. Weller, *J. Am. Chem. Soc.*, 2011, **133**, 11076.
- [9] A. L. Colebatch, B. W. Hawkey Gilder, G. R. Whittell, N. L. Oldroyd, I. Manners and A. S. Weller, *Chem. Eur.J.*, 2018, **24**, 5450.
- [10] T. Beweries, J. Thomas, M. Klahn, A. Schulz, D. Heller and U. Rosenthal, *ChemCatChem*, 2011, **3**, 1865.
- [11] H. E. Gottlieb, V. Kotlyar and A. J. Nudelman, *Org. Chem.*, 1997, **62**, 7512.
